# Supplementary material for: DANCE provides an open-source and low-cost approach to quantify aggression and courtship in Drosophila
Source: eLife. 2025 Dec 29;14:RP105465. doi: 10.7554/eLife.105465 (PMC12747525; doi:10.7554/eLife.105465)
Supplement: Figure 2—figure supplement 1—source data 1. [file elife-105465-fig2-figsupp1-data1.xlsx]

## Sheet: Sheet1
Comparison of annotations by two independent evaluators to assess observer bias during ground-truthing
	Lunges/20 mins			Wing extension index (15 mins)				Attempted copulation index (15 mins)				Circling index (15 mins)				Following index (15 mins)				Copulation index (15 mins)
Sr No.	Observer 1	Observer 2		Sr No.	Observer 1	Observer 2		Sr No.	Observer 1	Observer 2		Sr No.	Observer 1	Observer 2		Sr No.	Observer 1	Observer 2		Sr No.	Observer 1	Observer 2
1	55	48		1	0.523	0.586		1	0.008	0.007		1	0.108	0.118		1	0.024	0.022		1	0	0
2	53	53		2	0.435	0.447		2	0.016	0.005		2	0.052	0.065		2	0.03	0.036		2	0	0
3	69	56		3	0.177	0.141		3	0.017	0.019		3	0.065	0.084		3	0.031	0.025		3	0	0
4	76	128		4	0.113	0.113		4	0.019	0.007		4	0.105	0.136		4	0.032	0.041		4	0	0
5	60	97		5	0.201	0.17		5	0.019	0.014		5	0.175	0.204		5	0.032	0.062		5	0	0
6	47	43		6	0.585	0.572		6	0.021	0.008		6	0.135	0.177		6	0.036	0.052		6	0	0
7	96	103		7	0.166	0.147		7	0.028	0.014		7	0.047	0.053		7	0.05	0.039		7	0	0
8	54	45		8	0.403	0.42		8	0.03	0.026		8	0.017	0.018		8	0.054	0.095		8	0	0
9	370	418		9	0.425	0.42		9	0.038	0.05		9	0.013	0.017		9	0.056	0.059		9	0	0
10	436	464		10	0.155	0.159		10	0.046	0.019		10	0.024	0.028		10	0.072	0.071		10	0	0
11	419	453		11	0.102	0.107		11	0.051	0.041		11	0.042	0.056		11	0.082	0.085		11	0	0
12	144	145		12	0.332	0.348		12	0.052	0.049		12	0.011	0.016		12	0.085	0.098		12	0	0
13	123	143		13	0.409	0.431		13	0.052	0.04						13	0.303	0.289		13	0	0
14	206	208						14	0.067	0.045										14	0	0
15	172	185						15	0.074	0.054										15	0	0
								16	0.077	0.014										16	0	0
																				17	0	0
																				18	0	0.099
																				19	0.195	0.125
																				20	0.282	0.282
																				21	0.332	0.227
																				22	0.646	0.642
																				23	0.782	0.78
																				24	0.881	0.737
																				25	0.953	0.988
