# Supplementary material for: DANCE provides an open-source and low-cost approach to quantify aggression and courtship in Drosophila
Source: eLife. 2025 Dec 29;14:RP105465. doi: 10.7554/eLife.105465 (PMC12747525; doi:10.7554/eLife.105465)
Supplement: Figure 2—figure supplement 2—source data 1. [file elife-105465-fig2-figsupp2-data1.xlsx]

## Sheet: R2_Video 8
Regression analysis
Sr no.	Ground-truth	DANCE lunge classifier 8
1	292	257
2	154	168
3	306	299
4	305	274
5	215	225
6	328	303
7	268	278
8	46	52
9	63	61
10	50	51
11	57	44
12	63	73
13	76	66
14	64	61
15	45	56
16	88	95
17	42	54
18	89	84
19	68	68
20	69	66
21	71	82
22	78	103
23	365	319
24	205	190
25	254	219
26	246	230
27	373	330
28	432	370
29	426	352
30	323	317
31	153	156
32	199	201
33	203	212
34	152	143
35	129	108
36	183	180
37	144	117
38	172	171
39	191	180
40	159	148

## Sheet: R2_Video 9
Regression analysis
Sr no.	Ground-truth	DANCE lunge classifier 9
1	292	279
2	154	182
3	306	311
4	305	298
5	215	244
6	328	304
7	268	276
8	46	55
9	63	58
10	50	56
11	57	40
12	63	68
13	76	64
14	64	62
15	45	57
16	88	101
17	42	67
18	89	98
19	68	71
20	69	84
21	71	92
22	78	113
23	365	349
24	205	213
25	254	230
26	246	253
27	373	340
28	432	369
29	426	382
30	323	308
31	153	163
32	199	185
33	203	221
34	152	140
35	129	112
36	183	201
37	144	144
38	172	167
39	191	191
40	159	183

## Sheet: R2_Video 10
Regression analysis
Sr no.	Ground-truth	DANCE lunge classifier 10
1	292	253
2	154	174
3	306	297
4	305	281
5	215	221
6	328	314
7	268	275
8	46	59
9	63	72
10	50	58
11	57	76
12	63	71
13	76	77
14	64	87
15	45	52
16	88	101
17	42	55
18	89	96
19	68	74
20	69	82
21	71	89
22	78	103
23	365	371
24	205	207
25	254	247
26	246	231
27	373	372
28	432	393
29	426	363
30	323	300
31	153	155
32	199	180
33	203	213
34	152	139
35	129	126
36	183	205
37	144	140
38	172	169
39	191	193
40	159	162

## Sheet: R2_Video 11
Regression analysis
Sr no.	Ground-truth	DANCE lunge classifier 11
1	292	263
2	154	186
3	306	309
4	305	294
5	215	227
6	328	319
7	268	289
8	46	55
9	63	68
10	50	53
11	57	59
12	63	69
13	76	76
14	64	60
15	45	47
16	88	96
17	42	54
18	89	94
19	68	78
20	69	81
21	71	80
22	78	103
23	365	353
24	205	231
25	254	249
26	246	250
27	373	370
28	432	436
29	426	419
30	323	297
31	153	163
32	199	206
33	203	210
34	152	144
35	129	123
36	183	195
37	144	139
38	172	186
39	191	206
40	159	172

## Sheet: Performance metrics_comparison
Video 8				Video 9				Video 10				Video 11
Lunge classifier				Lunge classifier				Lunge classifier				Lunge classifier
Performance metrics				Performance metrics				Performance metrics				Performance metrics
	X	100-X			X	100-X			X	100-X			X	100-X
Precison DANCE	77.6272	22.38		Precison DANCE	78.7336	21.27		Precison DANCE	77.7458	22.26		Precison DANCE	76.8	23.2
Recall DANCE	69.8559	30.15		Recall DANCE	73.0714	26.93		Recall DANCE	72.7705	27.23		Recall DANCE	71.53	28.47
F1 score DANCE	73.5368	26.47		F1 score DANCE	75.7969	24.21		F1 score DANCE	75.1759	24.83		F1 score DANCE	73.6	26.4
