# Supplementary material for: DANCE provides an open-source and low-cost approach to quantify aggression and courtship in Drosophila
Source: eLife. 2025 Dec 29;14:RP105465. doi: 10.7554/eLife.105465 (PMC12747525; doi:10.7554/eLife.105465)
Supplement: Figure 2—source data 1. [file elife-105465-fig2-data1.xlsx]

## Sheet: Comparison_4 methods
Lunges/20 mins
Sr No.	Ground-truthing	DANCE	CADABRA	Divider assay classifier
1	42	47	37	21
2	45	53	38	22
3	46	54	38	22
4	50	55	42	31
5	57	59	43	32
6	63	60	44	32
7	63	68	45	33
8	64	69	47	42
9	68	76	51	44
10	69	78	52	48
11	71	80	54	50
12	76	81	58	51
13	78	94	58	51
14	88	96	61	51
15	89	103	61	52
16	129	123	74	60
17	144	139	74	61
18	152	144	75	73
19	153	163	85	74
20	154	172	95	76
21	159	186	102	89
22	172	186	103	94
23	183	195	103	102
24	191	206	104	109
25	199	206	108	112
26	203	210	116	119
27	205	227	119	126
28	215	231	120	130
29	246	249	121	132
30	254	250	140	132
31	268	263	149	134
32	292	289	153	138
33	305	294	154	138
34	306	297	158	152
35	323	309	164	161
36	328	319	212	224
37	365	353	213	244
38	373	370	228	255
39	426	419	240	306
40	432	436	255	352

## Sheet: Low aggressive
Low aggressive
Lunges/20 mins
Sr No.	Ground-truthing	DANCE	CADABRA	Divider assay classifier
1	42	47	37	21
2	45	53	38	22
3	46	54	38	22
4	50	55	42	31
5	57	59	43	32
6	63	60	44	32
7	63	68	45	33
8	64	69	47	42
9	68	76	51	44
10	69	78	52	48

## Sheet: Moderately aggressive
Moderately aggressive
Lunges/20 mins
Sr No.	Ground-truthing	DANCE	CADABRA	Divider assay classifier
1	71	80	54	50
2	76	81	58	51
3	78	94	58	51
4	88	96	61	51
5	89	103	61	52
6	129	123	74	60
7	144	139	74	61
8	152	144	75	73
9	153	163	85	74
10	154	172	95	76
11	159	186	102	89

## Sheet: Highly aggressive
Highly aggressive
Lunges/20 mins
Sr No.	Ground-truthing	DANCE	CADABRA	Divider assay classifier
1	172	186	103	94
2	183	195	103	102
3	191	206	104	109
4	199	206	108	112
5	203	210	116	119
6	205	227	119	126
7	215	231	120	130
8	246	249	121	132
9	254	250	140	132
10	268	263	149	134
11	292	289	153	138

## Sheet: Hyper-aggressive
Hyper-aggressive
Lunges/20 mins
Sr No.	Ground-truthing	DANCE	CADABRA	Divider assay classifier
1	305	294	154	138
2	306	297	158	152
3	323	309	164	161
4	328	319	212	224
5	365	353	213	244
6	373	370	228	255
7	426	419	240	306
8	432	436	255	352

## Sheet: DANCE vs Ground-truthing_R2
		DANCE	Ground-truthing
Sr. no:	Movie name	Count for Lunges	Count for Lunges
1	C1_p02	263	279
2	C1_p03	186	182
3	C1_p04	309	311
4	C1_p05	294	298
5	C1_p10	227	244
6	C1_p11	319	304
7	C1_p12	289	276
8	A3_p02	55	55
9	A3_p03	68	58
10	A3_p04	53	56
11	B1_p11	59	40
12	B2_p06	69	68
13	C1_p08	76	64
14	A2_p07	60	62
15	C3_p04	47	57
16	C2_p12	96	101
17	A3_p03	54	67
18	A3_p05	94	98
19	A3_p08	78	71
20	C3_p09	81	84
21	D3_p06	80	92
22	D1_p11	103	113
23	A2_p12	353	349
24	C3_p02	231	213
25	C3_p06	249	230
26	B3_p05	250	253
27	B3_p01	370	340		SUMMARY OUTPUT
28	B3_p07	436	369
29	B3_p11	419	382		Regression Statistics
30	B3_p12	297	308		Multiple R	0.980389
31	D1_p05	163	163		R Square	0.976087
32	D1_p09	206	185		Adjusted R Square	0.976037
33	D1_p11	210	221		Standard Error	15.4477
34	D1_p12	144	140		Observations	40
35	A3_p09	123	112
36	B3_p01	195	201		ANOVA
37	D1_p11	139	144			df	SS	MS	F	Significance F
38	A3_p02	186	167		Regression	1	464964	464964	1948.46	2.92116e-34
39	C2_p02	206	191		Residual	38	9068.01	238.632
40	C2_p10	172	183		Total	39	474032
						Coefficients	Standard Error	t Stat	P-value	Lower 95%	Upper 95%	Lower 95.0%	Upper 95.0%
					Intercept	-5.90773	4.92215	-1.20023	0.237478	-15.8721	4.05665	-15.8721	4.05665
					X Variable 1	1.0581	0.0239707	44.1413	2.92116e-34	1.00957	1.10663	1.00957	1.10663

## Sheet: CADABRA vs DANCE_R2
		CADABRA	Ground truthing
Sr. no:	Movie name	Count for Lunges	Count for Lunges
1	C1_p02	140	292
2	C1_p03	95	154
3	C1_p04	149	306
4	C1_p05	153	305
5	C1_p10	103	215
6	C1_p11	164	328
7	C1_p12	154	268
8	A3_p02	45	46
9	A3_p03	51	63
10	A3_p04	37	50
11	B1_p11	44	57
12	B2_p06	42	63
13	C1_p08	54	76
14	A2_p07	43	64
15	C3_p04	38	45
16	C2_p12	58	88
17	A3_p03	38	42
18	A3_p05	75	89
19	A3_p08	58	68
20	C3_p09	47	69
21	D3_p06	52	71		SUMMARY OUTPUT
22	D1_p11	103	78
23	A2_p12	255	365		Regression Statistics
24	C3_p02	102	205		Multiple R	0.955924
25	C3_p06	119	254		R Square	0.903791
26	B3_p05	158	246		Adjusted R Square	0.911523
27	B3_p01	212	373		Standard Error	18.1986
28	B3_p07	240	432		Observations	40
29	B3_p11	228	426
30	B3_p12	213	323		ANOVA
31	D1_p05	74	125			df	SS	MS	F	Significance F
32	D1_p09	74	145		Regression	1	133400	133400	402.79	8.00251e-22
33	D1_p11	120	229		Residual	38	12585.2	331.189
34	D1_p12	61	138		Total	39	145985
35	A3_p09	61	126
36	B3_p01	108	183			Coefficients	Standard Error	t Stat	P-value	Lower 95%	Upper 95%	Lower 95.0%	Upper 95.0%
37	D1_p11	85	159		Intercept	14.7784	5.33118	2.77207	0.00857912	3.986	25.5708	3.986	25.5708
38	A3_p02	121	167		X Variable 1	0.507946	0.0253092	20.0696	8.00251e-22	0.456711	0.559182	0.456711	0.559182
39	C2_p02	104	197
40	C2_p10	116	163

## Sheet: Groundtruth vs Divider_R2
	JAABA	Ground-truthing	Divider assay
Movie name	Count for Lunges	Count for Lunges	Count for Lunges
C1_p02	263	292	112
C1_p03	186	154	74
C1_p04	309	306	134
C1_p05	294	305	152
C1_p10	227	215	109
C1_p11	319	328	126
C1_p12	289	268	130
A3_p02	55	46	21
A3_p03	68	63	42
A3_p04	53	50	32
B1_p11	59	57	22
B2_p06	69	63	31
C1_p08	76	76	60
A2_p07	60	64	33
C3_p04	47	45	22
C2_p12	96	88	61
A3_p03	54	42	44
A3_p05	94	89	102
A3_p08	78	68	51
C3_p09	81	69	32
D3_p06	80	71	48
D1_p11	103	78	51
A2_p12	353	365	352
C3_p02	231	205	119
C3_p06	249	254	138			SUMMARY OUTPUT
B3_p05	250	246	138
B3_p01	370	373	244			Regression Statistics
B3_p07	436	432	255			Multiple R	0.887279
B3_p11	419	426	306			R Square	0.773264
B3_p12	297	323	224			Adjusted R Square	0.781666
D1_p05	163	125	52			Standard Error	36.9116
D1_p09	206	145	50			Observations	40
D1_p11	210	229	89
D1_p12	144	138	76			ANOVA
A3_p09	123	126	51				df	SS	MS	F	Significance F
B3_p01	195	183	132			Regression	1	191598	191598	140.625	2.43901e-14
D1_p11	139	159	94			Residual	38	51773.8	1362.47
A3_p02	186	167	132			Total	39	243371
C2_p02	206	197	73
C2_p10	172	163	161				Coefficients	Standard Error	t Stat	P-value	Lower 95%	Upper 95%	Lower 95.0%	Upper 95.0%
						Intercept	-3.57064	10.8131	-0.330215	0.743051	-25.4605	18.3192	-25.4605	18.3192
						X Variable 1	0.608745	0.0513338	11.8586	2.43901e-14	0.504825	0.712664	0.504825	0.712664

## Sheet: Precision, Recall, F1 Score
Performance metrics	x	100-x
Precison DANCE	78.73	21.27
Precison CADABRA	19.53	80.47
Precison Divider	60.868	39.132
Recall DANCE	73.07	26.93
Recall CADABRA	27.97	72.03
Recall Divider	35.799	64.201
F1 score DANCE	75.79	24.21
F1 score CADABRA	23	77
F1 score Divider	45.083	54.917
