# Supplementary material for: DANCE provides an open-source and low-cost approach to quantify aggression and courtship in Drosophila
Source: eLife. 2025 Dec 29;14:RP105465. doi: 10.7554/eLife.105465 (PMC12747525; doi:10.7554/eLife.105465)
Supplement: Figure 3—figure supplement 1—source data 1. [file elife-105465-fig3-figsupp1-data1.xlsx]

## Sheet: Index_Individual values
Wing extension index (15 mins): Mated females
Sr No.	Ground-truth	DANCE	Matebook
1	0.009	0.016	0.048
2	0.024	0.03	0.03
3	0.056	0.061	0.036
4	0.06	0.068	0.037
5	0.102	0.094	0.05
6	0.139	0.129	0.085
7	0.146	0.156	0.096
8	0.155	0.133	0.084
9	0.159	0.159	0.132
10	0.166	0.161	0.111
11	0.195	0.175	0.13
12	0.201	0.212	0.147
13	0.332	0.338	0.283
14	0.367	0.364	0.318
15	0.403	0.38	0.354
16	0.409	0.377	0.069
17	0.424	0.39	0.242
18	0.425	0.394	0.274
19	0.427	0.418	0.386
20	0.455	0.406	0.255
21	0.471	0.424	0.361
22	0.479	0.441	0.324
23	0.585	0.536	0.469
24	0.615	0.548	0.504
25	0.683	0.637	0.407

## Sheet: Index_Box plots
Wing extension index (15 mins): Mated females
Sr No.	Ground-truth	DANCE	Matebook
1	0.009	0.016	0.048
2	0.024	0.03	0.03
3	0.056	0.061	0.036
4	0.06	0.068	0.037
5	0.102	0.094	0.05
6	0.139	0.129	0.085
7	0.146	0.156	0.096
8	0.155	0.133	0.084
9	0.159	0.159	0.132
10	0.166	0.161	0.111
11	0.195	0.175	0.13
12	0.201	0.212	0.147
13	0.332	0.338	0.283
14	0.367	0.364	0.318
15	0.403	0.38	0.354
16	0.409	0.377	0.069
17	0.424	0.39	0.242
18	0.425	0.394	0.274
19	0.427	0.418	0.386
20	0.455	0.406	0.255
21	0.471	0.424	0.361
22	0.479	0.441	0.324
23	0.585	0.536	0.469
24	0.615	0.548	0.504
25	0.683	0.637	0.407

## Sheet: R2_Ground-truth vs DANCE
Regression analysis
Wing extension index (15 mins): Mated females
Sr No.	Ground-truth	DANCE
1	0.009	0.016
2	0.024	0.03
3	0.056	0.061
4	0.06	0.068
5	0.102	0.094
6	0.139	0.129
7	0.146	0.156
8	0.155	0.133
9	0.159	0.159
10	0.166	0.161
11	0.195	0.175
12	0.201	0.212
13	0.332	0.338
14	0.367	0.364
15	0.403	0.38
16	0.409	0.377
17	0.424	0.39
18	0.425	0.394
19	0.427	0.418
20	0.455	0.406
21	0.471	0.424
22	0.479	0.441
23	0.585	0.536
24	0.615	0.548
25	0.683	0.637

## Sheet: R2_Ground-truth vs MateBook
Regression analysis
Wing extension index (15 mins): Mated females
Sr No.	Ground-truth	MateBook
1	0.009	0.048
2	0.024	0.03
3	0.056	0.036
4	0.06	0.037
5	0.102	0.05
6	0.139	0.085
7	0.146	0.096
8	0.155	0.084
9	0.159	0.132
10	0.166	0.111
11	0.195	0.13
12	0.201	0.147
13	0.332	0.283
14	0.367	0.318
15	0.403	0.354
16	0.409	0.069
17	0.424	0.242
18	0.425	0.274
19	0.427	0.386
20	0.455	0.255
21	0.471	0.361
22	0.479	0.324
23	0.585	0.469
24	0.615	0.504
25	0.683	0.407

## Sheet: Performance metrics
Performance metrics
	X	100-X
Precison DANCE	93.01	6.99
Precison Matebook	85.01	14.99
Recall DANCE	96.15	3.85
Recall Matebook	85.84	14.16
F1 score DANCE	94.55	5.45
F1 score Matebook	85.42	14.58
