# Supplementary material for: DANCE provides an open-source and low-cost approach to quantify aggression and courtship in Drosophila
Source: eLife. 2025 Dec 29;14:RP105465. doi: 10.7554/eLife.105465 (PMC12747525; doi:10.7554/eLife.105465)
Supplement: Figure 3—source data 1. [file elife-105465-fig3-data1.xlsx]

## Sheet: Index_Individual values
Wing extension index (15 mins): decapitated virgin females
Sr No.	Ground-truth	DANCE	Matebook
1	0.051	0.059	0.041
2	0.054	0.058	0.013
3	0.107	0.124	0.093
4	0.113	0.123	0.029
5	0.167	0.202	0.164
6	0.168	0.18	0.212
7	0.177	0.144	0.106
8	0.217	0.221	0.196
9	0.287	0.283	0.181
10	0.367	0.341	0.158
11	0.427	0.403	0.127
12	0.435	0.438	0.196
13	0.457	0.429	0.404
14	0.523	0.564	0.101
15	0.551	0.527	0.016

## Sheet: Index_Box plots
Wing extension index (15 mins): decapitated virgin females
Sr No.	Ground-truth	DANCE	Matebook
1	0.051	0.059	0.041
2	0.054	0.058	0.013
3	0.107	0.124	0.093
4	0.113	0.123	0.029
5	0.167	0.202	0.164
6	0.168	0.18	0.212
7	0.177	0.144	0.106
8	0.217	0.221	0.196
9	0.287	0.283	0.181
10	0.367	0.341	0.158
11	0.427	0.403	0.127
12	0.435	0.438	0.196
13	0.457	0.429	0.404
14	0.523	0.564	0.101
15	0.551	0.527	0.016

## Sheet: R2_Ground-truth vs DANCE
Regression analysis
Wing extension index (15 mins): decapitated virgin females
Sr No.	Ground-truth	DANCE
1	0.051	0.059
2	0.054	0.058
3	0.107	0.124
4	0.113	0.123
5	0.167	0.202
6	0.168	0.18
7	0.177	0.144
8	0.217	0.221
9	0.287	0.283
10	0.367	0.341
11	0.427	0.403
12	0.435	0.438
13	0.457	0.429
14	0.523	0.564
15	0.551	0.527

## Sheet: R2_Ground-truth vs MateBook
Regression analysis
Wing extension index (15 mins): decapitated virgin females
Sr No.	Ground-truth	Matebook
1	0.051	0.041
2	0.054	0.013
3	0.107	0.093
4	0.113	0.029
5	0.167	0.164
6	0.168	0.212
7	0.177	0.106
8	0.217	0.196
9	0.287	0.181
10	0.367	0.158
11	0.427	0.127
12	0.435	0.196
13	0.457	0.404
14	0.523	0.101
15	0.551	0.016

## Sheet: Performance metrics
Performance metrics
	X	100-X
Precison DANCE	92.19	7.82
Precison Matebook	69.68	30.33
Recall DANCE	98.09	1.92
Recall Matebook	60.24	39.77
F1 score DANCE	95.05	4.96
F1 score Matebook	64.61	35.4
