# Supplementary material for: DANCE provides an open-source and low-cost approach to quantify aggression and courtship in Drosophila
Source: eLife. 2025 Dec 29;14:RP105465. doi: 10.7554/eLife.105465 (PMC12747525; doi:10.7554/eLife.105465)
Supplement: Figure 4—figure supplement 1—source data 1. [file elife-105465-fig4-figsupp1-data1.xlsx]

## Sheet: Index_Individual values
Copulation index (15 mins): Mixed female dataset
Sr No.	Ground-truth	DANCE	Matebook
1	0	0	0
2	0	0	0
3	0	0	0
4	0	0	0
5	0	0	0
6	0	0	0
7	0	0	0
8	0	0	0
9	0	0	0
10	0	0	0
11	0	0	0
12	0	0	0
13	0	0	0.073
14	0.06	0.099	0.06
15	0.197	0.125	0.197
16	0.282	0.282	0.283
17	0.333	0.227	0.333
18	0.647	0.642	0
19	0.781	0.78	0.782
20	0.881	0.737	0.881
21	0.953	0.988	0.953

## Sheet: Index_Box plots
Copulation index (15 mins): Mixed female dataset
Sr No.	Ground-truth	DANCE	Matebook
1	0	0	0
2	0	0	0
3	0	0	0
4	0	0	0
5	0	0	0
6	0	0	0
7	0	0	0
8	0	0	0
9	0	0	0
10	0	0	0
11	0	0	0
12	0	0	0
13	0	0	0.073
14	0.06	0.099	0.06
15	0.197	0.125	0.197
16	0.282	0.282	0.283
17	0.333	0.227	0.333
18	0.647	0.642	0
19	0.781	0.78	0.782
20	0.881	0.737	0.881
21	0.953	0.988	0.953

## Sheet: R2_Ground-truth vs DANCE
Regression analysis
Copulation index (15 mins): Mixed female dataset
Sr No.	Ground-truth	DANCE
1	0	0
2	0	0
3	0	0
4	0	0
5	0	0
6	0	0
7	0	0
8	0	0
9	0	0
10	0	0
11	0	0
12	0	0
13	0	0
14	0.06	0.099
15	0.197	0.125
16	0.282	0.282
17	0.333	0.227
18	0.647	0.642
19	0.781	0.78
20	0.881	0.737
21	0.953	0.988

## Sheet: R2_Ground-truth vs MateBook
Regression analysis
Copulation index (15 mins): Mixed female dataset
Sr No.	Ground-truth	Matebook
1	0	0
2	0	0
3	0	0
4	0	0
5	0	0
6	0	0
7	0	0
8	0	0
9	0	0
10	0	0
11	0	0
12	0	0
13	0	0.073
14	0.06	0.06
15	0.197	0.197
16	0.282	0.283
17	0.333	0.333
18	0.647	0
19	0.781	0.782
20	0.881	0.881
21	0.953	0.953

## Sheet: Performance metrics
Performance metrics
	X	100-X
Precison DANCE	100	0
Precison Matebook	94.83	5.17
Recall DANCE	100	0
Recall Matebook	94.83	5.17
F1 score DANCE	100	0
F1 score Matebook	94.83	5.17
