# Supplementary material for: DANCE provides an open-source and low-cost approach to quantify aggression and courtship in Drosophila
Source: eLife. 2025 Dec 29;14:RP105465. doi: 10.7554/eLife.105465 (PMC12747525; doi:10.7554/eLife.105465)
Supplement: Figure 4—source data 1. [file elife-105465-fig4-data1.xlsx]

## Sheet: Index_Individual values
Attempted copulation (15 mins): Both mated and decapitated virgin females
Sr No.	Groud-truth	DANCE	MateBook
1	0.006	0.006	0.054
2	0.007	0.005	0.047
3	0.008	0.01	0.042
4	0.01	0.009	0.075
5	0.017	0.017	0.041
6	0.019	0.012	0.087
7	0.019	0.015	0.035
8	0.019	0.018	0.063
9	0.023	0.024	0.08
10	0.028	0.02	0.052
11	0.038	0.034	0.063
12	0.051	0.055	0.094
13	0.052	0.054	0.108
14	0.052	0.043	0.053
15	0.066	0.059	0.111
16	0.074	0.076	0.142
17	0.097	0.089	0.106
18	0.012	0.034	0.193
19	0.016	0.013	0.184
20	0.017	0.036	0.148
21	0.018	0.026	0.149
22	0.019	0.026	0.296
23	0.02	0.02	0.288
24	0.021	0.018	0.1
25	0.025	0.028	0.174
26	0.03	0.024	0.171
27	0.03	0.048	0.154
28	0.033	0.02	0.272
29	0.046	0.056	0.291
30	0.061	0.048	0.489
31	0.067	0.062	0.425
32	0.077	0.077	0.391

## Sheet: Index_Box plots
Attempted copulation (15 mins): Both mated and decapitated virgin females
Sr No.	Groud-truth	DANCE	MateBook
1	0.006	0.006	0.054
2	0.007	0.005	0.047
3	0.008	0.01	0.042
4	0.01	0.009	0.075
5	0.017	0.017	0.041
6	0.019	0.012	0.087
7	0.019	0.015	0.035
8	0.019	0.018	0.063
9	0.023	0.024	0.08
10	0.028	0.02	0.052
11	0.038	0.034	0.063
12	0.051	0.055	0.094
13	0.052	0.054	0.108
14	0.052	0.043	0.053
15	0.066	0.059	0.111
16	0.074	0.076	0.142
17	0.097	0.089	0.106
18	0.012	0.034	0.193
19	0.016	0.013	0.184
20	0.017	0.036	0.148
21	0.018	0.026	0.149
22	0.019	0.026	0.296
23	0.02	0.02	0.288
24	0.021	0.018	0.1
25	0.025	0.028	0.174
26	0.03	0.024	0.171
27	0.03	0.048	0.154
28	0.033	0.02	0.272
29	0.046	0.056	0.291
30	0.061	0.048	0.489
31	0.067	0.062	0.425
32	0.077	0.077	0.391

## Sheet: R2_Ground-truth vs DANCE
Regression analysis
Attempted copulation (15 mins): Both mated and decapitated virgin females
Sr No.	Groud-truth	DANCE
1	0.006	0.006
2	0.007	0.005
3	0.008	0.01
4	0.01	0.009
5	0.017	0.017
6	0.019	0.012
7	0.019	0.015
8	0.019	0.018
9	0.023	0.024
10	0.028	0.02
11	0.038	0.034
12	0.051	0.055
13	0.052	0.054
14	0.052	0.043
15	0.066	0.059
16	0.074	0.076
17	0.097	0.089
18	0.012	0.034
19	0.016	0.013
20	0.017	0.036
21	0.018	0.026
22	0.019	0.026
23	0.02	0.02
24	0.021	0.018
25	0.025	0.028
26	0.03	0.024
27	0.03	0.048
28	0.033	0.02
29	0.046	0.056
30	0.061	0.048
31	0.067	0.062
32	0.077	0.077

## Sheet: R2_Ground-truth vs MateBook
Regression analysis
Attempted copulation (15 mins): Both mated and decapitated virgin females
Sr No.	Groud-truth	MateBook
1	0.006	0.054
2	0.007	0.047
3	0.008	0.042
4	0.01	0.075
5	0.017	0.041
6	0.019	0.087
7	0.019	0.035
8	0.019	0.063
9	0.023	0.08
10	0.028	0.052
11	0.038	0.063
12	0.051	0.094
13	0.052	0.108
14	0.052	0.053
15	0.066	0.111
16	0.074	0.142
17	0.097	0.106
18	0.012	0.193
19	0.016	0.184
20	0.017	0.148
21	0.018	0.149
22	0.019	0.296
23	0.02	0.288
24	0.021	0.1
25	0.025	0.174
26	0.03	0.171
27	0.03	0.154
28	0.033	0.272
29	0.046	0.291
30	0.061	0.489
31	0.067	0.425
32	0.077	0.391

## Sheet: Performance metrics
Performance metrics
	X	100-X
Precison DANCE	82.55	17.45
Precison Matebook	20.1	79.9
Recall DANCE	89.24	10.76
Recall Matebook	83.16	16.84
F1 score DANCE	85.77	14.23
F1 score Matebook	32.38	67.62
