# Supplementary material for: DANCE provides an open-source and low-cost approach to quantify aggression and courtship in Drosophila
Source: eLife. 2025 Dec 29;14:RP105465. doi: 10.7554/eLife.105465 (PMC12747525; doi:10.7554/eLife.105465)
Supplement: Figure 5—figure supplement 1—source data 1. [file elife-105465-fig5-figsupp1-data1.xlsx]

## Sheet: Index_Individual values
Circling index (15 mins): Mated females
Sr No.	Ground-truth	DANCE	Matebook
1	0.002	0.005	0
2	0.003	0.002	0.002
3	0.004	0.005	0.004
4	0.004	0.003	0.001
5	0.004	0.004	0.001
6	0.004	0.006	0.001
7	0.007	0.007	0.006
8	0.007	0.008	0.005
9	0.007	0.009	0.004
10	0.009	0.009	0.007
11	0.011	0.011	0.006
12	0.013	0.009	0.009
13	0.015	0.014	0.009
14	0.017	0.019	0.005
15	0.019	0.017	0.01
16	0.023	0.021	0.001
17	0.024	0.025	0.012
18	0.035	0.027	0.026
19	0.042	0.044	0.018

## Sheet: Index_Box plots
Circling index (15 mins): Mated females
Sr No.	Ground-truth	DANCE	Matebook
1	0.002	0.005	0
2	0.003	0.002	0.002
3	0.004	0.005	0.004
4	0.004	0.003	0.001
5	0.004	0.004	0.001
6	0.004	0.006	0.001
7	0.007	0.007	0.006
8	0.007	0.008	0.005
9	0.007	0.009	0.004
10	0.009	0.009	0.007
11	0.011	0.011	0.006
12	0.013	0.009	0.009
13	0.015	0.014	0.009
14	0.017	0.019	0.005
15	0.019	0.017	0.01
16	0.023	0.021	0.001
17	0.024	0.025	0.012
18	0.035	0.027	0.026
19	0.042	0.044	0.018

## Sheet: R2_Ground-truth vs DANCE
Regression analysis
Circling index (15 mins): Mated females
Sr No.	Ground-truth	DANCE
1	0.002	0.005
2	0.003	0.002
3	0.004	0.005
4	0.004	0.003
5	0.004	0.004
6	0.004	0.006
7	0.007	0.007
8	0.007	0.008
9	0.007	0.009
10	0.009	0.009
11	0.011	0.011
12	0.013	0.009
13	0.015	0.014
14	0.017	0.019
15	0.019	0.017
16	0.023	0.021
17	0.024	0.025
18	0.035	0.027
19	0.042	0.044

## Sheet: R2_Ground-truth vs MateBook
Regression analysis
Circling index (15 mins): Mated females
Sr No.	Ground-truth	Matebook
1	0.002	0
2	0.003	0.002
3	0.004	0.004
4	0.004	0.001
5	0.004	0.001
6	0.004	0.001
7	0.007	0.006
8	0.007	0.005
9	0.007	0.004
10	0.009	0.007
11	0.011	0.006
12	0.013	0.009
13	0.015	0.009
14	0.017	0.005
15	0.019	0.01
16	0.023	0.001
17	0.024	0.012
18	0.035	0.026
19	0.042	0.018

## Sheet: Performance metrics
Performance metrics
	X	100-X
Precison DANCE	83.81	16.19
Precison Matebook	81.02	18.98
Recall DANCE	88.29	11.71
Recall Matebook	58.53	41.47
F1 score DANCE	85.99	14.01
F1 score Matebook	67.96	32.04
