# Supplementary material for: DANCE provides an open-source and low-cost approach to quantify aggression and courtship in Drosophila
Source: eLife. 2025 Dec 29;14:RP105465. doi: 10.7554/eLife.105465 (PMC12747525; doi:10.7554/eLife.105465)
Supplement: Figure 5—figure supplement 2—source data 1. [file elife-105465-fig5-figsupp2-data1.xlsx]

## Sheet: Index_Individual values
Following index (15 mins): Mated females
Sr No.	Ground-truth	DANCE	Matebook
1	0.005	0.006	0.002
2	0.008	0.006	0
3	0.015	0.009	0.007
4	0.021	0.023	0.021
5	0.024	0.024	0.025
6	0.029	0.03	0.03
7	0.036	0.039	0.027
8	0.036	0.036	0.037
9	0.041	0.038	0.03
10	0.042	0.039	0.001
11	0.044	0.032	0.046
12	0.053	0.05	0.059
13	0.059	0.051	0.035
14	0.07	0.054	0.061
15	0.078	0.056	0.061
16	0.092	0.072	0.103
17	0.092	0.084	0.063
18	0.101	0.099	0.026
19	0.107	0.101	0.068
20	0.115	0.105	0.102
21	0.126	0.1	0.074
22	0.18	0.182	0.131
23	0.241	0.225	0.157
24	0.242	0.251	0.179
25	0.317	0.303	0.228

## Sheet: Index_Box plots
Following index (15 mins): Mated females
Sr No.	Ground-truth	DANCE	Matebook
1	0.005	0.006	0.002
2	0.008	0.006	0
3	0.015	0.009	0.007
4	0.021	0.023	0.021
5	0.024	0.024	0.025
6	0.029	0.03	0.03
7	0.036	0.039	0.027
8	0.036	0.036	0.037
9	0.041	0.038	0.03
10	0.042	0.039	0.001
11	0.044	0.032	0.046
12	0.053	0.05	0.059
13	0.059	0.051	0.035
14	0.07	0.054	0.061
15	0.078	0.056	0.061
16	0.092	0.072	0.103
17	0.092	0.084	0.063
18	0.101	0.099	0.026
19	0.107	0.101	0.068
20	0.115	0.105	0.102
21	0.126	0.1	0.074
22	0.18	0.182	0.131
23	0.241	0.225	0.157
24	0.242	0.251	0.179
25	0.317	0.303	0.228

## Sheet: R2_Ground-truth vs DANCE
Regression analysis
Following index (15 mins): Mated females
Sr No.	Ground-truth	DANCE
1	0.005	0.006
2	0.008	0.006
3	0.015	0.009
4	0.021	0.023
5	0.024	0.024
6	0.029	0.03
7	0.036	0.039
8	0.036	0.036
9	0.041	0.038
10	0.042	0.039
11	0.044	0.032
12	0.053	0.05
13	0.059	0.051
14	0.07	0.054
15	0.078	0.056
16	0.092	0.072
17	0.092	0.084
18	0.101	0.099
19	0.107	0.101
20	0.115	0.105
21	0.126	0.1
22	0.18	0.182
23	0.241	0.225
24	0.242	0.251
25	0.317	0.303

## Sheet: R2_Ground-truth vs MateBook
Regression analysis
Following index (15 mins): Mated females
Sr No.	Ground-truth	Matebook
1	0.005	0.002
2	0.008	0
3	0.015	0.007
4	0.021	0.021
5	0.024	0.025
6	0.029	0.03
7	0.036	0.027
8	0.036	0.037
9	0.041	0.03
10	0.042	0.001
11	0.044	0.046
12	0.053	0.059
13	0.059	0.035
14	0.07	0.061
15	0.078	0.061
16	0.092	0.103
17	0.092	0.063
18	0.101	0.026
19	0.107	0.068
20	0.115	0.102
21	0.126	0.074
22	0.18	0.131
23	0.241	0.157
24	0.242	0.179
25	0.317	0.228

## Sheet: Performance metrics
Performance metrics
	X	100-X
Precison DANCE	91.16	8.84
Precison Matebook	65.77	34.23
Recall DANCE	91.07	8.93
Recall Matebook	83.39	16.61
F1 score DANCE	91.12	8.88
F1 score Matebook	73.53	26.47
