# Supplementary material for: DANCE provides an open-source and low-cost approach to quantify aggression and courtship in Drosophila
Source: eLife. 2025 Dec 29;14:RP105465. doi: 10.7554/eLife.105465 (PMC12747525; doi:10.7554/eLife.105465)
Supplement: Figure 5—figure supplement 3—source data 1. [file elife-105465-fig5-figsupp3-data1.xlsx]

## Sheet: Wing extension_decapitated
Wing extension decapitated females
Performance metrics
	X	100-X
Precison DANCE	93.73	6.27
Precison Matebook	77.15	22.85
Recall DANCE	92.94	7.06
Recall Matebook	38.84	61.16
F1 score DANCE	93.33	6.67
F1 score Matebook	51.67	48.33

## Sheet: Wing extension_mated
Wing extension mated females
Performance metrics
	X	100-X
Precison DANCE	93.42	6.58
Precison Matebook	92.44	7.56
Recall DANCE	84.98	15.02
Recall Matebook	65.39	34.61
F1 score DANCE	89	11
F1 score Matebook	76.6	23.4

## Sheet: Copulation
Copulation
Performance metrics
	X	100-X
Precison DANCE	98.17	1.83
Precison Matebook	99.92	0.08
Recall DANCE	95.55	4.45
Recall Matebook	84.34	15.66
F1 score DANCE	96.85	3.15
F1 score Matebook	91.47	8.53

## Sheet: Attempted copulation_Mixed
Attempted copulation mixed dataset
Performance metrics
	X	100-X
Precison DANCE	79.25	20.75
Precison Matebook	14.05	85.95
Recall DANCE	74.74	25.26
Recall Matebook	63.55	36.45
F1 score DANCE	76.93	23.07
F1 score Matebook	23.01	76.99

## Sheet: Circling_decapitated
Circling decapitated females
Performance metrics
	X	100-X
Precison DANCE	87.04	12.96
Precison Matebook	95	5
Recall DANCE	75.55	24.45
Recall Matebook	45.04	54.96
F1 score DANCE	80.89	19.11
F1 score Matebook	61.11	38.89

## Sheet: Circling_Mated
Circling mated females
Performance metrics
	X	100-X
Precison DANCE	76.22	23.78
Precison Matebook	81.09	18.91
Recall DANCE	71.81	28.19
Recall Matebook	42.33	57.67
F1 score DANCE	73.95	26.05
F1 score Matebook	55.62	44.38

## Sheet: Following
Following females
Performance metrics
	X	100-X
Precison DANCE	91.03	8.97
Precison Matebook	78.07	21.93
Recall DANCE	83.09	16.91
Recall Matebook	58.79	41.21
F1 score DANCE	86.88	13.12
F1 score Matebook	67.07	32.93
