# Supplementary material for: DANCE provides an open-source and low-cost approach to quantify aggression and courtship in Drosophila
Source: eLife. 2025 Dec 29;14:RP105465. doi: 10.7554/eLife.105465 (PMC12747525; doi:10.7554/eLife.105465)
Supplement: Figure 5—source data 1. [file elife-105465-fig5-data1.xlsx]

## Sheet: Index_Individual values
Circling (15 mins): decapitated virgin females
Sr No.	Groud-truth	DANCE	MateBook
1	0.032	0.026	0.004
2	0.033	0.024	0.005
3	0.041	0.035	0.016
4	0.047	0.045	0
5	0.052	0.046	0.027
6	0.065	0.051	0.028
7	0.103	0.113	0.065
8	0.105	0.099	0.061
9	0.108	0.081	0.054
10	0.112	0.107	0.049
11	0.135	0.137	0.078
12	0.175	0.136	0.077

## Sheet: Index_Box plots
Circling (15 mins): decapitated virgin females
Sr No.	Groud-truth	DANCE	MateBook
1	0.032	0.026	0.004
2	0.033	0.024	0.005
3	0.041	0.035	0.016
4	0.047	0.045	0
5	0.052	0.046	0.027
6	0.065	0.051	0.028
7	0.103	0.113	0.065
8	0.105	0.099	0.061
9	0.108	0.081	0.054
10	0.112	0.107	0.049
11	0.135	0.137	0.078
12	0.175	0.136	0.077

## Sheet: R2_Ground-truth vs DANCE
Regression analysis
Circling (15 mins): decapitated virgin females
Sr No.	Groud-truth	DANCE
1	0.032	0.026
2	0.033	0.024
3	0.041	0.035
4	0.047	0.045
5	0.052	0.046
6	0.065	0.051
7	0.103	0.113
8	0.105	0.099
9	0.108	0.081
10	0.112	0.107
11	0.135	0.137
12	0.175	0.136

## Sheet: R2_Ground-truth vs MateBook
Regression analysis
Circling (15 mins): decapitated virgin females
Sr No.	Groud-truth	MateBook
1	0.032	0.004
2	0.033	0.005
3	0.041	0.016
4	0.047	0
5	0.052	0.027
6	0.065	0.028
7	0.103	0.065
8	0.105	0.061
9	0.108	0.054
10	0.112	0.049
11	0.135	0.078
12	0.175	0.077

## Sheet: Performance metrics
Performance metrics
	X	100-X
Precison DANCE	98.04	1.96
Precison Matebook	99.26	0.74
Recall DANCE	92.09	7.91
Recall Matebook	70.75	29.25
F1 score DANCE	94.97	5.03
F1 score Matebook	82.62	17.38
