# Supplementary material for: DANCE provides an open-source and low-cost approach to quantify aggression and courtship in Drosophila
Source: eLife. 2025 Dec 29;14:RP105465. doi: 10.7554/eLife.105465 (PMC12747525; doi:10.7554/eLife.105465)
Supplement: Figure 7—figure supplement 2—source data 1. [file elife-105465-fig7-figsupp2-data1.xlsx]

## Sheet: Day1_Green light OFF
Day time activity: Day 1, Green light OFF, No silencing
TH-GAL4 GH	TH-GAL4 SH	UAS-GtACR1 GH	UAS-GtACR1 SH	TH-GAL4>UAS-GtACR1 GH	TH-GAL4>UAS-GtACR1 SH
299	665	348	59	268	280
79	654	357	233	300	529
78	668	526	453	288	367
309	331	280	206	458	416
355	140	141	746	749	561
410	602	107	403	395	714
154	557	530	19	1037	280
225	341	108	576	48	397
173	263	248	254	524	713
432	345	482	579	151	300
579	265	280	421	165	505
172	358	147	601	938	314
599	532	194	557	856	448
257	221	597	715	422	446
329	121	77	356	367	862
263	544	85	27	429	363
189	618	278	408	523	186
574	442	34	142	259	225
244	470	95	208	277	399
513	334	245	258	380	421
387	713	15	255	500	761
188	460	304	623	277	375
847	760	101	451	611	728
456	259	210	481	158	672
361	714	225	387	398	384
560	414	379	377	170	615
332	543	130	262	184	307
573	355	209	317	327	131
386	558	251	287	318	63
508	1317	106	485	356	359
361	485	302	92	167	185
327	238	188	314	217	868
534	223	206	267	593	213
348	173	170	131	576	414
420	267	209	100	392	413
488	255	417	92	383	510
416	352	269	197	476	10
513	360	232	380	434	163
321	218	110	323	116	120
101	209	141	205	28	203
453	469	323	407	156	501
284	220	278	277	75	479
322	266	564		524	941
		310		21	286
		598		78	64
		446		624	176
		194		794	69
		538		105	533
		31		129	422
		323		470	398
		170		977	517
				461
				245
				484

## Sheet: Day2_Green light ON
Day time activity: Day 2, Green light ON, Silencing
TH-GAL4 GH	TH-GAL4 SH	UAS-GtACR1 GH	UAS-GtACR1 SH	TH-GAL4>UAS-GtACR1 GH	TH-GAL4>UAS-GtACR1 SH
407	731	192	45	75	295
497	653	249	254	660	1132
72	544	502	355	1	960
448	416	415	367	606	1
232	238	263	515	682	707
380	632	89	383	3	69
240	389	657	35	1094	10
386	442	242	652	0	2
203	364	273	281	271	531
503	275	479	346	573	4
543	309	200	401	184	468
160	427	238	330	683	276
701	328	301	544	542	1022
109	598	465	693	321	559
468	690	216	328	148	964
406	278	301	38	851	7
314	679	159	325	586	2
629	398	19	26	33	185
263	1101	13	51	263	298
558	447	48	107	209	809
428	692	26	124	376	484
292	222	140	762	208	691
817	785	240	203	636	665
593	262	247	464	142	621
353	537	259	311	353	4
727	339	391	621	24	402
308	475	59	163	46	91
550	935	177	253	228	1427
533	392	56	255	348	3
471	206	101	463	45	29
309	334	232	23	12	244
305	276	210	431	300	561
255	144	424	126	566	8
534	268	244	137	349	42
348	244	392	210	690	5
426	339	79	110	325	376
397	90	194	181	387	446
547	150	474	194	143	20
363	428	45	82	83	282
180	225	361	212	1	11
253	228	363	389	146	364
493		268	399	5	6
320		385		459	362
		287		22	2
		332		432	481
		317		433	537
		173		1
		539		114
		6		446
		291		773
		265		1318
				205
				419
