# Supplementary material for: DANCE provides an open-source and low-cost approach to quantify aggression and courtship in Drosophila
Source: eLife. 2025 Dec 29;14:RP105465. doi: 10.7554/eLife.105465 (PMC12747525; doi:10.7554/eLife.105465)
Supplement: Figure 7—figure supplement 3—source data 1. [file elife-105465-fig7-figsupp3-data1.xlsx]

## Sheet: Aggression_13mm_Optogenetics
Aggression: Green light ON, Silencing for 20 minutes (13mm chamber)
TH-GAL4 GH	TH-GAL4 SH	UAS-GtACR1 GH	UAS-GtACR1 SH	TH-GAL4>UAS-GtACR1 GH	TH-GAL4>UAS-GtACR1 SH
6	7	6	2	3	118
5	13	6	4	6	104
8	3	9	4	1	133
6	37	2	20	6	64
7	5	5	13	3	146
9	5	3	15	1	296
6	11	9	8	2	77
3	10	4	3	5	33
1	3	5	10	7	427
6	4	4	24	4	55
6	1	7	8	1	79
5	10	4	14	1	152
4	9	2	18	6	214
7	5	8	11	3	171
4	6	8	12	4	296
2	33	5	15	5	249
9	26	2	19	3	48
4	44	5	28	2	315
1	21	2	30	6	106
3	23	1	19	7	83
2	18	7	12	3	87
9	14	7	32	4	134
7	12	16	8	1	48
2	6	8	15	9	77
16	9	3	7	1	61
7	8	11	9	3	162
7	6	7	11	1	57
9	9	9	24	2	196
12	10	3	8	4	176
	10	8	4	1	201
	13			3	52
				4	55
				3
				3
				7
				5
				3
				3

## Sheet: Aggression_17mm_Optogenetics
Aggression: Green light ON, Silencing for 20 minutes (17mm chamber)
TH-GAL4 GH	TH-GAL4 SH	UAS-GtACR1 GH	UAS-GtACR1 SH	TH-GAL4>UAS-GtACR1 GH	TH-GAL4>UAS-GtACR1 SH
6	10	5	12	3	147
6	14	2	4	2	27
9	9	4	8	11	50
5	16	2	2	8	99
3	8	7	4	4	171
2	9	5	6	5	166
6	11	5	11	6	68
6	11	4	18	4	77
1	10	2	4	4	123
5	7	6	9	1	210
6	16	2	8	3	47
2	5	3	6	2	146
1	20	2	12	2	113
2	21	2	8	2	31
2	14	7	10	3	160
6	11	4	11	5	31
5	20	7	4	6	43
3	27	1	3	1	96
4	27	7	8	5	220
8	24	6	9	7	35
2	23	7	3	5	217
4	14	7	4	1	127
10	14	5	24	1	188
6	6	4	20	3	247
2	6	2	16	3	76
6	13	7	2	1	25
6	4	5	24	5	71
5	10	6	6	4
4	19	4	14	1
	5	4	18	2
	7	12	7
	6

## Sheet: Aggression_21mm_Optogenetics
Aggression: Green light ON, Silencing for 20 minutes (21mm chamber)
TH-GAL4 GH	TH-GAL4 SH	UAS-GtACR1 GH	UAS-GtACR1 SH	TH-GAL4>UAS-GtACR1 GH	TH-GAL4>UAS-GtACR1 SH
5	10	8	25	10	326
10	4	5	19	6	79
9	22	4	15	7	145
9	8	1	16	7	69
8	3	3	22	7	122
3	3	5	5	10	369
13	5	25	7	8	54
14	21	8	23	6	47
8	8	10	11	4	44
9	25	4	8	5	288
8	19	3	14	8	46
16	15	10	13	1	72
	16	7	9	4	42
	22	8	16	3	39
	5	4	8	5	83
		6
