# Supplementary material for: DANCE provides an open-source and low-cost approach to quantify aggression and courtship in Drosophila
Source: eLife. 2025 Dec 29;14:RP105465. doi: 10.7554/eLife.105465 (PMC12747525; doi:10.7554/eLife.105465)
Supplement: Figure 7—figure supplement 4—source data 1. [file elife-105465-fig7-figsupp4-data1.xlsx]

## Sheet: Wing extension_11vs13vs17
Wildtype Drosophila courtship in DANCE chambers of varying diameters
Wing extension
11mm			13mm			17mm
CS GH	CS SH		CS GH	CS SH		CS GH	CS SH
49	130		58	84		52	86
22	125		58	101		1	31
53	115		55	60		11	61
54	77		43	92		36	65
80	93		10	85		2	81
42	87		45	78		21	87
70	140		37	87		1	86
19	90		4	91		13	127
40	91		38	81		31	86
21	82		56	78		2	68
66	102		1	87		21	75
11	107		54	100		6	56
51	116		56	86		50	65
2	94		70	102		22	66
66	111		51	105		6	79
65	83		60	95		25	60
53	103		69	73		52	106
65	114		65	90		22	127
51	85		57	101		10	99
52	117		12	77		57	81
28	93		27	78			52
49	94		34	93			130
	105		21	101			104
	95		36	78			83
	122		36	55			87
	137			87
	83			63
	105			62
	139
	73
	115
	108
	84

## Sheet: Attempted copulation_11vs13vs17
Wildtype Drosophila courtship in DANCE chambers of varying diameters
Attempted copulation
11mm			13mm			17mm
CS GH	CS SH		CS GH	CS SH		CS GH	CS SH
43	45		5	28		29	12
7	18		9	35		0	8
6	10		22	12		0	8
12	15		8	31		3	10
16	9		2	35		13	29
25	17		16	24		2	69
13	29		6	20		0	15
4	27		1	26		2	9
13	11		2	39		11	42
1	20		5	19		0	46
8	37		0	12		12	43
4	9		1	20		0	22
10	14		13	38		5	7
15	31		7	44		1	16
30	28		4	49		2	35
10	14		3	37		8	5
7	38		28	23		9	19
9	40		2	17		11	0
19	14		18	22		4	42
3	19		14	25		4	22
8	36		3	36			23
	4		6	38			18
	20		10	38			24
	13		9	34			95
	32		0	4			36
	43			26
	42			34
	16			23
	26
	10
	24
	5
	3

## Sheet: Following_11vs13vs17
Wildtype Drosophila courtship in DANCE chambers of varying diameters
Following
11mm			13mm			17mm
CS GH	CS SH		CS GH	CS SH		CS GH	CS SH
0	0		0	0		1	0
0	0		2	0		2	0
0	0		1	0		0	1
0	0		0	1		3	0
0	0		0	1		0	0
0	0		0	0		0	0
0	0		0	0		1	0
0	0		1	1		0	0
0	0		0	0		0	0
0	0		0	0		3	0
0	0		2	0		0	0
0	0		0	0		2	0
0	0		0	0		0	0
0	0		0	0		0	0
0	0		1	0		1	0
0	0		0	0		0	0
1	0		0	0		0	0
2	0		0	0		0	0
0	0		0	1		0	0
0	0		0	0		0	0
1	0		0	0		0	1
0	0		0	0			0
	0		0	0			1
	0		0	0			0
	0		0	0
	0			0
	0			0
	0			1
	0
	0
	0
	1
	3

## Sheet: Circling_11vs13vs17
Wildtype Drosophila courtship in DANCE chambers of varying diameters
Circling
11mm			13mm			17mm
CS GH	CS SH		CS GH	CS SH		CS GH	CS SH
32	20		45	45		39	53
13	38		53	34		20	14
27	36		34	17		2	44
9	28		23	59		4	10
27	48		4	29		4	44
2	39		7	34		1	64
12	53		16	61		16	30
20	41		7	34		2	13
27	42		5	45		1	5
3	27		6	30		1	19
36	66		24	44		14	12
8	99		9	23		2	2
28	8		13	52		2	12
0	13		17	38		39	45
19	7		20	45		11	75
15	2		9	22		2	6
28	15		14	31		1	55
2	5		20	8		52	18
18	26		9	11			8
20	35		46	2			51
4	11		1	4			2
39	53		20	12			40
14	7		6	12			5
9	46		7	36
	19		22
	38		1
	67
	12
	17
	19
	47
