# Supplementary material for: DANCE provides an open-source and low-cost approach to quantify aggression and courtship in Drosophila
Source: eLife. 2025 Dec 29;14:RP105465. doi: 10.7554/eLife.105465 (PMC12747525; doi:10.7554/eLife.105465)
Supplement: Figure 7—source data 1. [file elife-105465-fig7-data1.xlsx]

## Sheet: Circular vs DANCE_Courtship
Wildtype Drosophila courtship in Circular (Koemans et al., 2017) and DANCE chambers
Wing extension					Attempted copulation					Following					Circling
Circular		DANCE (11mm)			Circular		DANCE (11mm)			Circular		DANCE (11mm)			Circular		DANCE (11mm)
CS GH	CS SH	CS GH	CS SH		CS GH	CS SH	CS GH	CS SH		CS GH	CS SH	CS GH	CS SH		CS GH	CS SH	CS GH	CS SH
27	89	49	130		0	45	43	45		0	0	0	0		1	5	32	20
35	112	22	125		5	33	7	18		0	0	0	0		16	17	13	38
115	90	53	115		17	42	6	10		0	1	0	0		37	52	27	36
85	91	54	77		9	48	12	15		1	1	0	0		36	20	9	28
24	75	80	93		0	4	16	9		0	1	0	0		0	13	27	48
59	70	42	87		18	11	25	17		0	0	0	0		6	26	2	39
77	53	70	140		11	19	13	29		0	0	0	0		19	16	12	53
24	84	19	90		3	27	4	27		0	1	0	0		1	41	20	41
6	73	40	91		1	31	13	11		0	1	0	0		7	34	27	42
13	43	21	82		1	7	1	20		0	0	0	0		10	12	3	27
82	109	66	102		40	49	8	37		0	0	0	0		8	28	36	66
16	44	11	107		1	4	4	9		0	0	0	0		3	14	8	99
31	126	51	116		5	40	10	14		0	0	0	0		4	39	28	8
34	67	2	94		2	12	15	31		0	0	0	0		4	28	0	13
80	70	66	111		20	69	30	28		0	0	0	0		6	35	19	7
75	70	65	83		10	14	10	14		0	1	0	0		41	28	15	2
105	106	53	103		13	14	7	38		0	0	2	0		72	95	28	15
53	131	65	114		7	15	9	40		0	0	0	0		34	4	2	5
78	102	51	85		4	81	19	14		0	0	0	0		54	15	18	26
47	91	52	117		8	12	3	19		0	0	1	0		11	1	20	35
14	27	28	93		12	4	8	36		0	0	0	0		5	2	4	11
30	83	49	94		1	8		4		0	0		0		2	40	39	53
63	109		105		10	52		20		0	0		0		9	17	14	7
			95					13					0				9	46
			122					32					0					19
			137					43					0					38
			83					42					0					67
			105					16					0					12
			139					26					0					17
			73					10					0					19
			115					24					1					47
			108					5					3
			84					3

## Sheet: Circular vs DANCE_Aggression
Wildtype Drosophila aggression in Circular (Dankert et al., 2009) and DANCE chambers
Lunges (20 minutes)
Circular		DANCE (13mm)
GH	SH	GH	SH
18	31	19	12
23	31	11	25
25	288	9	23
38	40	12	16
28	280	21	20
21	128	21	11
15	21	33	14
15	18	15	98
41	213	2	11
29	70	5	21
23	36	4	1
40	17	2	45
28	49	1	23
44	24	52	24
36	13	0	28
8	52	39	0
2	29	15	13
32	20	26	46
5	84	20	54
35	32	14	8
41	36	27	11
5	30	26	48
26	27	39	79
49	20	22	55
36	33	15	12
4	34	40	133
18	31	13	21
18	13	25	92
37	39	59	173
7	22	26	196
0	55	41	40
11	27	16	30
32	14	38	19
48	19	37	264
34	49	51	53
11	46	32	284
		41	41
		67	60
		82	215
		70	51

## Sheet: Yeast extract food_Aggression
Yeast extract food
Lunges (20 minutes)
DANCE (13mm)
GH	SH
2	19
9	6
5	16
7	9
4	21
4	12
5	22
4	25
8	15
5	10
11	29
8	20
8	12
5	16
11	17
6	20
11	13
10	13
4	13
6	12
7	19
7	10
2	32
6	12
7	16
9	36
8	24
5	12
12	16
13	12
7	16
5	18
11	15
2	15
5	20
13	20
11	11
14	19
5

## Sheet: Dsk RNAi_Aggression
Genetic knockdown of Dsk in dilp2-GAL4 neurons					Genetic knockdown of Dsk in dilp2-GAL4 neurons
Lunges (20 minutes)					Lunges (20 minutes)
Circular					DANCE (13mm)
Dilp2-GAL4>attp2 GH	Dilp2-GAL4>attp2 SH	Dilp2-GAL4>Dsk-RNAi GH	Dilp2-GAL4>Dsk-RNAi SH		Dilp2-GAL4>attp2 GH	Dilp2-GAL4>attp2 SH	Dilp2-GAL4>Dsk-RNAi GH	Dilp2-GAL4>Dsk-RNAi SH
7	84	10	65		9	16	11	42
5	35	9	97		1	25	8	104
4	20	11	68		5	18	3	93
5	16	5	76		10	26	9	53
18	0	33	92		6	22	6	262
5	12	23	55		1	15	11	141
9	9	5	285		4	20	12	294
3	0	10	126		8	25	13	197
0	13	9	91		5	11	4	11
0	11	5	245		3	22	12	91
1	23	6	126		8	17	10	88
12	6	4	194		3	20	7	21
5	0	4	211		10	13	15	166
4	0	2	20		13	10	16	36
4	11	5	99		9	14	15	38
10	6	25	110		4	23	4	18
9	42	30	77		4	19	9	37
2	53	45	116		3	28	2	20
1	8	25	64		5	20	12	84
6	9	5	111		12	13	8	46
3	3	17	58		14	14	4	87
7	4	36	36		4	12	14	23
2	1	50	288		11	12	5	21
2	21	25	78		9	16	3	55

## Sheet: Optogenetics_Aggression
Aggression: Green light ON, Silencing for 20 minutes (13mm chamber)
TH-GAL4 GH	TH-GAL4 SH	UAS-GtACR1 GH	UAS-GtACR1 SH	TH-GAL4>UAS-GtACR1 GH	TH-GAL4>UAS-GtACR1 SH
18	24	19	144	3	175
23	76	6	36	72	56
24	9	5	89	2	279
7	3	31	47	2	112
33	11	7	9	1	50
17	25	11	58	11	114
9	12	9	43	6	94
18	13	4	4	9	209
29	28	19	3	11	57
25	17	6	17	19	116
5	15	8	40	19	185
15	34	13	15	4	98
26	18	3	18	3	12
3	7	2	56	5	126
26	4	21	9	1	237
26	18	6	31	4	306
5	8	10	77	9	184
7	19	9	126	2	302
21	11	15	15	3	62
18	62	13	16	5	33
17	29	6	9	34	69
	73		4	5	17
			10	7	31
				3
